# Supplementary material for: DWARF TILLER1, a WUSCHEL-Related Homeobox Transcription Factor, Is Required for Tiller Growth in Rice
Source: PLoS Genet. 2014 Mar 13;10(3):e1004154. doi: 10.1371/journal.pgen.1004154 (PMC3952828; doi:10.1371/journal.pgen.1004154)
Supplement: Table S7 — Primers used in this article. (XLS) [file pgen.1004154.s017.xls]

## Sheet: Sheet2
Table S7. Primers used in this article
Primers for qRT-PCR
Genes	Primer name	Sequence(5'-3')
OsACTIN	OsACTIN-F	GCCAATCGTGAGAAGATGACC
	OsACTIN-R	TCCATTTCCTGGTCATAGTCC
EF1α	EF1α-F	GCACGCTCTTCTTGCTTTCA
	EF1α-R	GGGTTGTAGCCGACCTTCTT
DWT1	DWT-F	TTGCTGCAAGTGCTATATCTGC
	DWT-R	ACAGCAATGATACGGATTGGAG
OsMCM3	MCM-F	GGTACACTTCCGATCACAGCG
	MCM-R	CCACATCCATTGGGTCGTTTC
OsCDC6	CDC6-F	GTTGAGTGGGCATAGGGTAGG
	CDC6-R	TCCGACTTGAAATACGAGGCAAT
CYCB2;2	CYCB2;3-F	TATTGGATGAGACCCTCTTCCTTAC
	CYCB2;3-R	TTCTTGTCAGATTGTGCAGCCTTGA
CDKB2;1	CDKB2;1-F	CTGATGTACCAGCTCTGCAAGGG
	CDKB2;1-R	AGCCCACAGACCAGATGTCAACC
CYCA3;1	CYCA3;3-F	CAAATCCATCAACCGCCAGAA
	CYCA3;3-R	TCAACTCAGATGCCCTGTAGCC
OsEXPA16	OsEXPA16-F	GGCTTGGCAATGGCGGGTAT
	OsEXPA16-R	TTCACGCACCGCACCTCGTA
OsE2FL	OsE2FL-F	GGGTGACGCTGATGGTGATAC
	OsE2FL-R	TGCTTTCTTTGGGATTGTTGA
XTH28	XTH28-F	GCGTACCACCACGGGTTCTTCA
	XTH28-R	CGTTGGTCTGCACCCTCCACTC
OsGA20OX1	OsGA20OX1-F	CATGCGCCTCAACTACTAC
	OsGA20OX1-R	GAGCGCCATGAAGGTGT
OsGA20OX2/SD1	OsGA20OX2-F	TCATGCGGTGCAACTACTA
	OsGA20OX2-R	GTGTCGCCGATGTTGAT
OsGA20OX3	OsGA20OX3-F	GCTCACCTTCTTCCTCAAC
	OsGA20OX3-R	GCCATTCCTTTGCTTGA
OsGA20OX4	OsGA20OX4-F	CGTCGCCGATTACTTCTC
	OsGA20OX4-R	TAGTAGTTGCACCGCATGA
OsRR6	OsRR6-F	GTCCCCAACGTCAACATGATC
	OsRR6-R	CACGTTCTCCGACGACATGAT
OsRR9/10	OsRR9.10-F	TCATGAGGACAGCCCAATTTCTA
	OsRR9.10-R	TGCAGTAGTCTGTGATGATCAGGTT
OsCKX4	OsCKX4-F	TTCTACCTGGTTGGGTTCCT
	OsCKX4-R	TGGGCTTTCCACTGCTTCT
OsCKX9	OsCKX9-F	GCCTTCCTCCTTATTCCACA
	OsCKX9-R	TGGGACCATTGTTACTGTCTTTC
Primers for fine mapping
	Primer name	Sequence(5'-3')
	WF9-F	CTAATTATTGGTCAAAGTAA
	WF9-R	AAGATGATGGGAGTATATTT
	WF11-F	TAGACTGTAATTCTCGGATGCGTT
	WF11-R	TTTAATAATTCAGCAAGTGGTTCG
	WF13-F	AACTCGCTATGCTTCACTTTTGC
	WF13-R	GTAGTAGGCGCTCGTGATGGC
	WF14-F	AATCAGCAAGCTAACAAATT
	WF14-R	GTTCTCAATTATATTCAGGG
	WF15-F	ACTGACACGATGATGCCCAA
	WF15-R	CGGTTTGAACATTTGCCACGAG
Primers for mutant genotyping
Mutant	Primer name	Sequence(5'-3')
dwt1 mutant	DWT1-JD-F	CAGAACCGCAAGTCCCGCTC
	DWT1-JD-R	TGAGGACAACACTACAAGAGAAG
slr1 muatnt	SLR1-JD-F	CGTCGTCCTCATCGTCGTCTTCC
	SLR1-JD-R	GCGATCACCTCAGGCTCCTCGTT
Primers for construction
Construction	Primer name	Sequence(5'-3')
DWT1 complementary	DWT1-PRO-F	GCATGGGAATTCCGGTTTGACGCTTACTGTGGT
	DWT1g-R2	CCTTAAGGTCACCTGGCGTTAAGCAAAATGATCAG
DWT1-YFP	DWT-YFP-F	AACTCGAGATGGCGTCGTCGAACAGGCACT
	DWT-YFP-R	AAACTAGTCATGACAACAATGTAGACGGCG
DWT1-probe	DWT1-probe-F	AAGAATTCGTGCCACCAGCAGATGCTCTAT
	DWT1-probe-R	AAGGATCCGATCGACGCCGCGCTGCTCTTG
