# Supplementary material for: DWARF TILLER1, a WUSCHEL-Related Homeobox Transcription Factor, Is Required for Tiller Growth in Rice
Source: PLoS Genet. 2014 Mar 13;10(3):e1004154. doi: 10.1371/journal.pgen.1004154 (PMC3952828; doi:10.1371/journal.pgen.1004154)
Supplement: Table S8 — Accession numbers used in this article. (XLS) [file pgen.1004154.s018.xls]

## Sheet: Sheet1
Table S8. Accession numbers used in this article.
Species	Accession number
Populus trichocarpa	XP_002331965.1
	XP_002305099.1
	XP_002319198.1
	XP_002319197.1
	XP_002325442.1
Vitis vinifera	XP_002273188.1
	XP_002269282.2
Medicago truncatula	XP_003593686.1
	XP_003621918.1
	XP_003624740.1
Solanum lycopersicum	NP_001234072.1(SLWOX9)
Petunia x hybrida	EF187281(EVERGREEN)
	EF187282(SISTER OF EVERGREEN)
Arabidopsis lyrata	XP_002881316.1
	XP_002865213.1
	XP_002873855.1
	XP_002884402.1
Arabidopsis thaliana	AT5G45980(AtWOX8/STPL)
	AT2G33880(AtWOX9/STIP)
	AT3G03660(AtWOX11)
	AT5G17810(AtWOX12)
	AT2G17950(AtWUS）
Brachypodium distachyon	XP_003565908.1
	XP_003566976.1
	XP_003571573.1
	XP_003559779.1
	XP_003558004.1
Sorghum bicolor	Sb09g028562
	Sb07g007600
	Sb02g043300
	Sb01g036670
Oryza sativa	LOC_Os01g47710(DWT1)
	LOC_Os08g14400
	LOC_Os07g48560(OsWOX11)
	LOC_Os03g20910
	LOC_Os07g34880(DWL1)
	LOC_Os05g48990(DWL2)
Triticum aestivum	CD905730.1
	CD923002.1
Hordeum vulgare	BQ466860.1
Zea mays	GRMZM2G097954_P02
	GRMZM2G031882_P01
	GRMZM2G133972_P01
	GRMZM2G111573_P01
	GRMZM2G018935_P01
	GRMZM2G170958_P01
	GRMZM2G162481_P01
	GRMZM2G067003_P01
	GRMZM2G016800_P01
	GRMZM2G022492_P01
Glycine max	Glyma13g24150.1
	Glyma07g32430.1
	Glyma10g08030.1
	Glyma13g21860.1
	Glyma19g29660.1
	Glyma03g01000.1
